# Supplementary material for: UPLC-LTQ-Orbitrap-Based Cell Metabolomics and Network Pharmacology Analysis to Reveal the Potential Antiarthritic Effects of Pristimerin: In Vitro, In Silico and In Vivo Study
Source: MDPI journal article supplement (doi:10.3390/metabo12090839), 2022-09-05
Supplement: s1 [file s1]

# UPLC-LTQ-Orbitrap-Based Cell Metabolomics and Network Pharmacology Analysis to Reveal the Potential Antiarthritic Effects of Pristimerin: In Vitro, in Silico and In Vivo Study

Mengying Lv <sup>1,2,\*†</sup>, Qiaoling Liang <sup>1,2,†</sup>, Zhaoyong Luo <sup>1,2,†</sup>, Bo Han <sup>3</sup>, Tengyang Ni <sup>1,2</sup>, Yang Wang <sup>1,2</sup>, Li Tao <sup>1,2</sup>, Weiting Lyu <sup>4</sup>, Jie Xiang <sup>1,\*</sup> and Yanqing Liu <sup>1,2,\*</sup>

<sup>1</sup> Department of Pharmacy, Institute of Translational Medicine, Medical College, Yangzhou University, Yangzhou 225001, China

<sup>2</sup> The Key Laboratory of Syndrome Differentiation and Treatment of Gastric Cancer of the State Administration of Traditional Chinese Medicine, Yangzhou 225001, China

<sup>3</sup> Key Laboratory of Xinjiang Phytomedicine Resource and Utilization, School of Pharmacy, Ministry of Education, Shihezi University, Shihezi 832002, China

<sup>4</sup> Department of Medicinal Chemistry, Rutgers University, Piscataway, NJ 08854, USA

\* Correspondence: lvmengying1988114@163.com (M.L.); jxiang@yzu.edu.cn (J.X.); liuyq@yzu.edu.cn (Y.L.)

† These authors contributed equally to this work.

**Table S1.** The identification results of potential biomarkers.

| Name                 | Formula                                                                       | Retention<br>time<br>(min) | Measured<br>(m/z) | ESI<br>ionization<br>mode | MS/MS fragments                     | Trend | Metabolic pathway              |
|----------------------|-------------------------------------------------------------------------------|----------------------------|-------------------|---------------------------|-------------------------------------|-------|--------------------------------|
| N-Methylnicotinamide | C <sub>7</sub> H <sub>8</sub> N <sub>2</sub> O                                | 0.636                      | 137.0707          | +                         | 119.0602                            | ↓     | Amino acid metabolism          |
| Glutamate            | C <sub>5</sub> H <sub>9</sub> NO <sub>4</sub>                                 | 0.660                      | 148.0600          | +                         | 130.0494                            | ↓     | Amino acid metabolism          |
| Methionine           | C <sub>5</sub> H <sub>11</sub> NO <sub>2</sub> S                              | 0.843                      | 150.0579          | +                         | 104.0526                            | ↓     | Amino acid metabolism          |
| Oxidized glutathione | C <sub>20</sub> H <sub>32</sub> N <sub>6</sub> O <sub>12</sub> S <sub>2</sub> | 0.845                      | 613.1581          | +                         | 484.1155,130.0495                   | ↓     | Glutathione metabolism         |
| Leucine*             | C <sub>6</sub> H <sub>13</sub> NO <sub>2</sub>                                | 0.659                      | 132.0763          | +                         | 115.0535                            | ↓     | Amino acid metabolism          |
| Phenylalanine        | C <sub>9</sub> H <sub>11</sub> NO <sub>2</sub>                                | 1.026                      | 166.0859          | +                         | 120.0803,103.0538,95.0487,77.0381   | ↓     | Phenylalanine metabolism       |
| LysoPE(20:4)         | C <sub>25</sub> H <sub>44</sub> NO <sub>7</sub> P                             | 6.859                      | 502.2919          | +                         | 484.2820,441.2394,361.2733          | ↓     | Glycerophospholipid catabolism |
| LysoPC(16:0)         | C <sub>24</sub> H <sub>50</sub> NO <sub>7</sub> P                             | 7.141                      | 496.3386          | +                         | 478.3275,184.0728                   | ↓     | Glycerophospholipid catabolism |
| LysoPE(16:0)         | C <sub>21</sub> H <sub>44</sub> NO <sub>7</sub> P                             | 7.333                      | 454.2918          | +                         | 313.2727                            | ↓     | Glycerophospholipid catabolism |
| LysoPE(18:1)         | C <sub>23</sub> H <sub>46</sub> NO <sub>7</sub> P                             | 7.600                      | 480.3074          | +                         | 462.2969,339.2886                   | ↓     | Glycerophospholipid catabolism |
| LysoPC(18:1)         | C <sub>26</sub> H <sub>52</sub> NO <sub>7</sub> P                             | 7.636                      | 522.3541          | +                         | 504.3451,184.0732,104.1068          | ↓     | Glycerophospholipid catabolism |
| LysoPE(18:0)         | C <sub>23</sub> H <sub>48</sub> NO <sub>7</sub> P                             | 8.517                      | 482.3225          | +                         | 464.3125,341.3037                   | ↓     | Glycerophospholipid catabolism |
| LysoPC(18:0)         | C <sub>26</sub> H <sub>54</sub> NO <sub>7</sub> P                             | 8.552                      | 524.3701          | +                         | 506.3608,341.3048,184.0732,104.1067 | ↑     | Glycerophospholipid catabolism |
| Myristic acid        | C <sub>14</sub> H <sub>28</sub> O <sub>2</sub>                                | 10.195                     | 227.2019          | -                         | 209.1909                            | ↑     | Fatty acid metabolism          |
| Ceramide(d18:0/12:0) | C <sub>30</sub> H <sub>61</sub> NO <sub>3</sub>                               | 11.031                     | 484.4708          | +                         | 466.4629,256.2628                   | ↑     | Lipid metabolism               |
| Palmitic acid        | C <sub>16</sub> H <sub>32</sub> O <sub>2</sub>                                | 11.701                     | 255.2327          | -                         | 237.2212                            | ↑     | Fatty acid metabolism          |
| Ceramide(d18:0/14:0) | C <sub>32</sub> H <sub>65</sub> NO <sub>3</sub>                               | 12.553                     | 512.5020          | +                         | 494.4912,256.2632                   | ↑     | Lipid metabolism               |
| Stearic acid         | C <sub>18</sub> H <sub>36</sub> O <sub>2</sub>                                | 13.847                     | 283.2639          | -                         | 265.2521                            | ↑     | Fatty acid metabolism          |
| Ceramide(d18:0/16:0) | C <sub>34</sub> H <sub>69</sub> NO <sub>3</sub>                               | 15.060                     | 540.5330          | +                         | 522.5965,284.2942,256.2632          | ↓     | Lipid metabolism               |
| SM(18:1/16:0)        | C <sub>39</sub> H <sub>79</sub> N <sub>2</sub> O <sub>6</sub> P               | 16.436                     | 703.5729          | +                         | 502.4972,184.0728                   | ↓     | Lipid metabolism               |

**Table S2.** Detailed intermolecular binding interactions of pristimerin with tumor necrosis factor- $\alpha$  (TNF- $\alpha$ )

| Protein                                          | Binding energy<br>(Kcal/mol) | Interacting residues                                                                    |
|--------------------------------------------------|------------------------------|-----------------------------------------------------------------------------------------|
| tumor necrosis factor- $\alpha$ (TNF- $\alpha$ ) | -9.5                         | Tyr59, Tyr119, Ile 155, Leu 120, Gly121, Tyr59, Gly121, His15, Tyr119, Ser60 and Tyr151 |

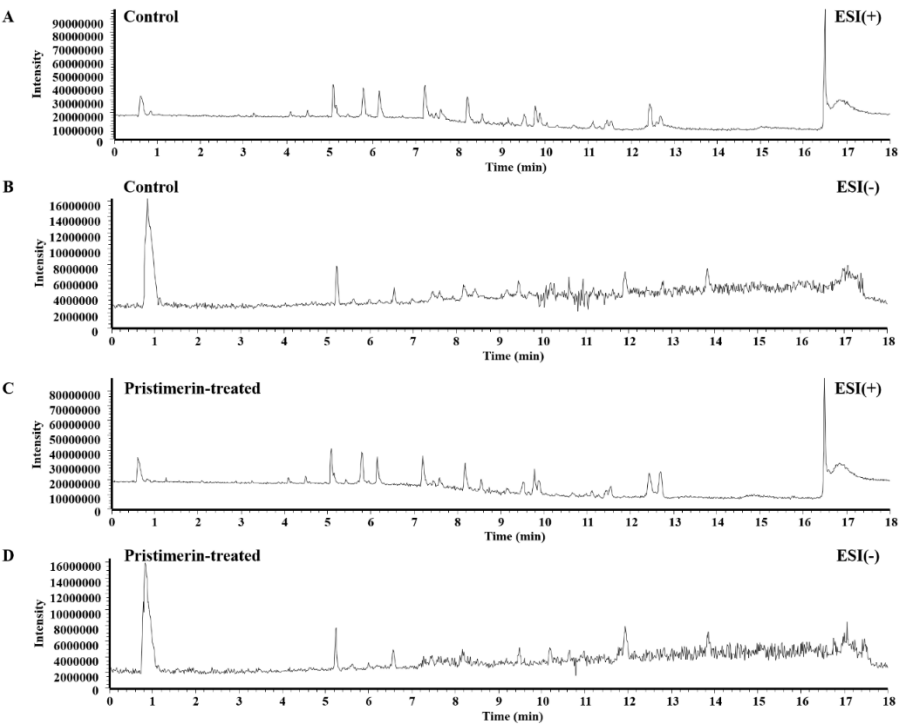

**Figure S1.** The representative total ion chromatograms (TICs) of the control group in the positive (A) and negative (B) mode and pristimerin-treated group in the positive (C) and negative (D) mode.

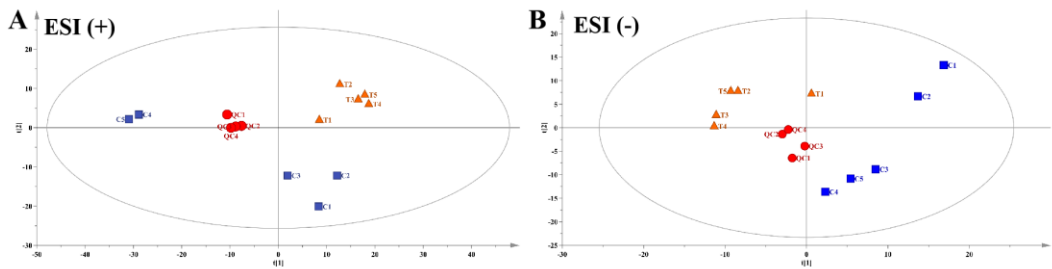

**Figure S2.** PCA scores plots based on global metabolic profiles of TNF- $\alpha$ -stimulated MH7A cells with or without pristimerin treatment in the positive (A) and negative (B) modes with following statistics

parameters:  $R^2X=0.654$ ,  $Q^2=0.353$  (A);  $R^2X=0.505$ ,  $Q^2=-0.101$  (B). The letter "C" refers to TNF- $\alpha$ -stimulated MH7A cells without pristimerin treatment and the letter "T" refers to TNF- $\alpha$ -stimulated MH7A cells with pristimerin treatment.
